# Supplementary material for: Follicular lymphoma–associated mutations in vacuolar ATPase ATP6V1B2 activate autophagic flux and mTOR
Source: JCI journal article supplement (doi:10.1172/jci98288), 2019-02-05
Supplement: sd1 [file 1]

A

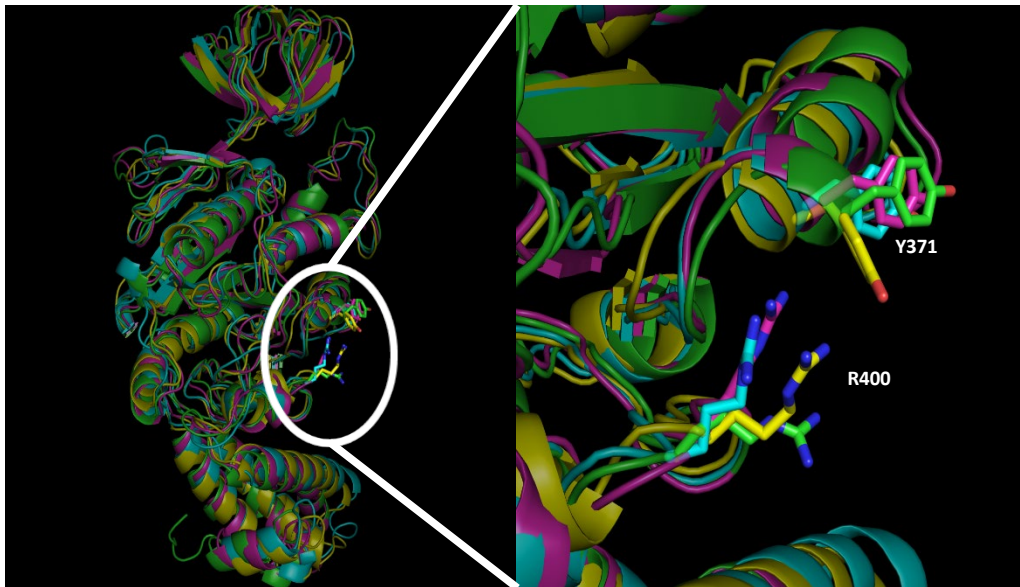

B

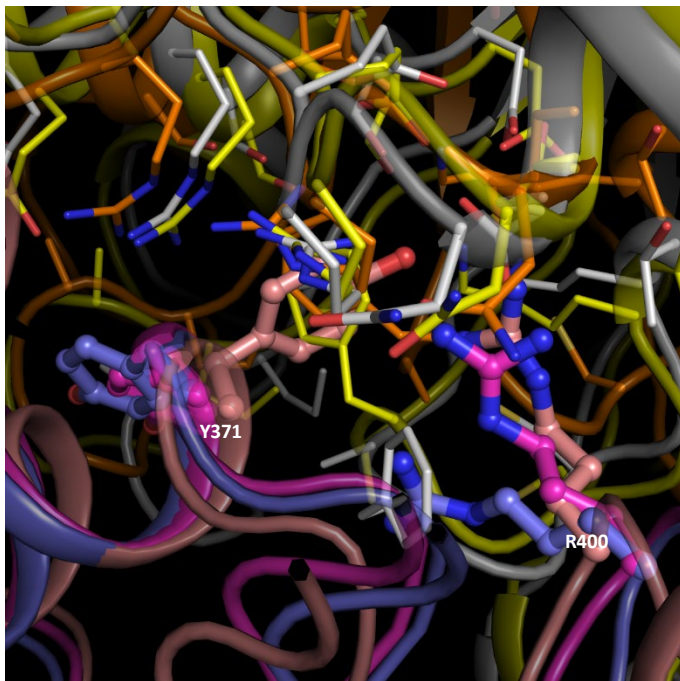

A

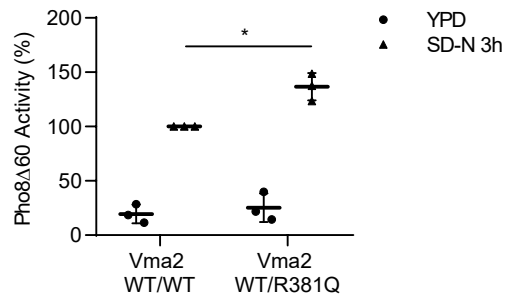

S Figure 2

B

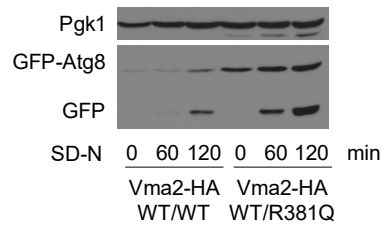

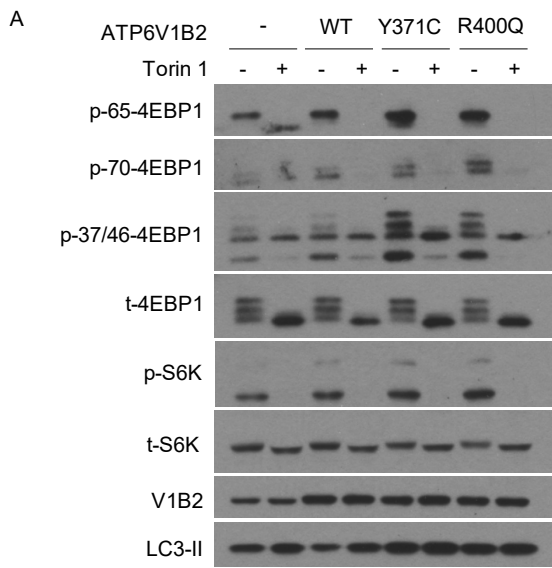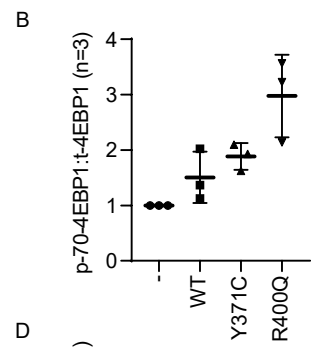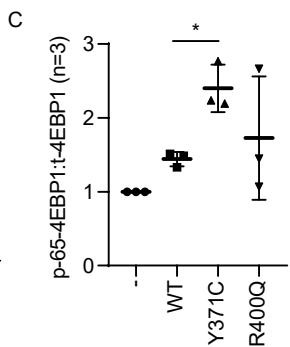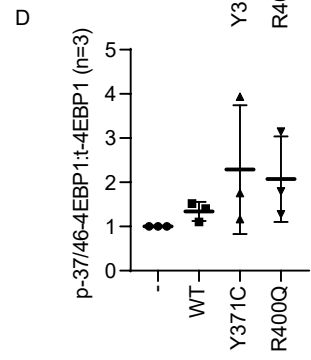

S Figure 3

A

HEK-293T

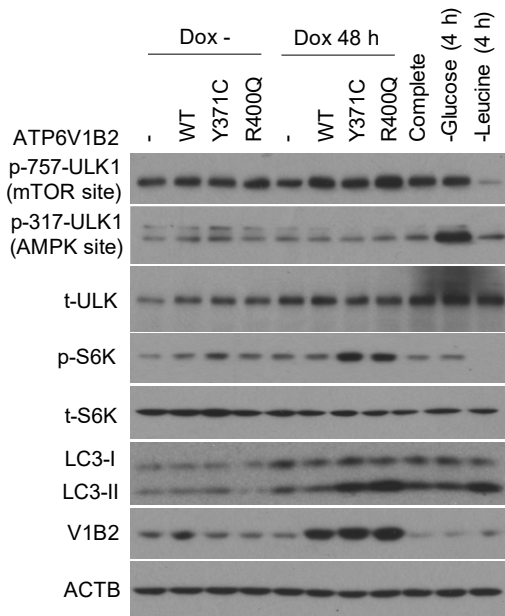

B

OCI-LY1 (lymphoma)

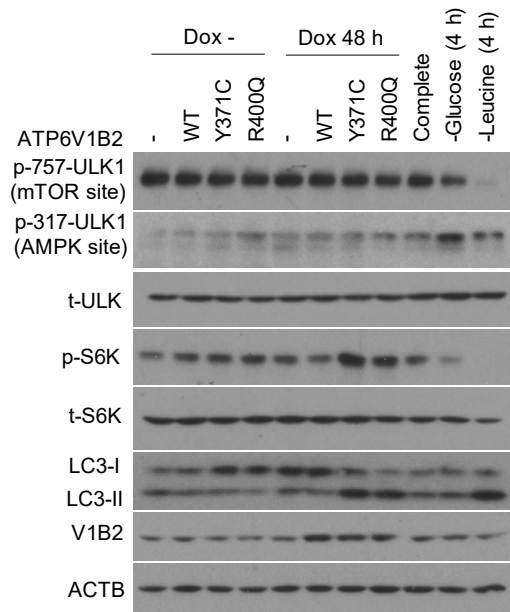

S Figure 4

A

HEK-293T

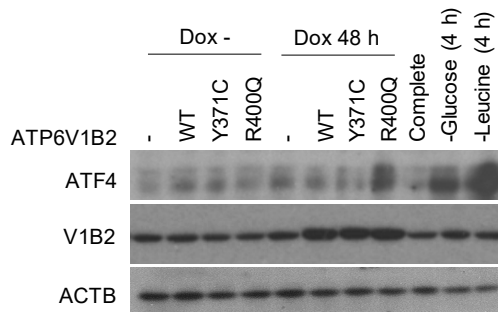

B

OCI-LY1 (lymphoma)

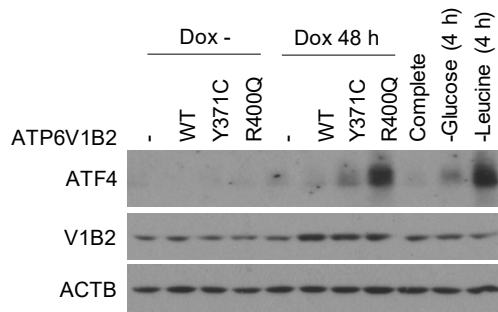

S Figure 5

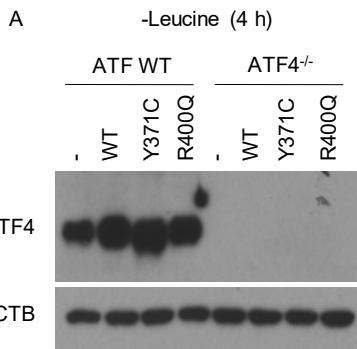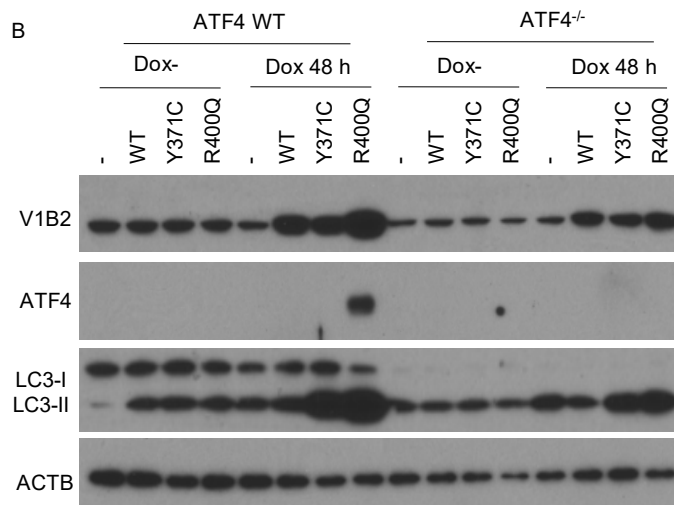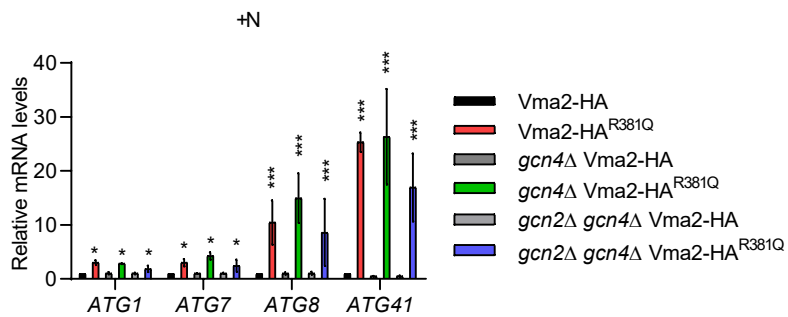

S Figure 6

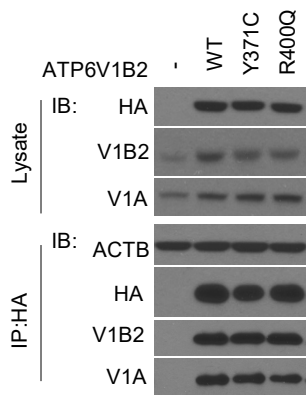

S Figure 7

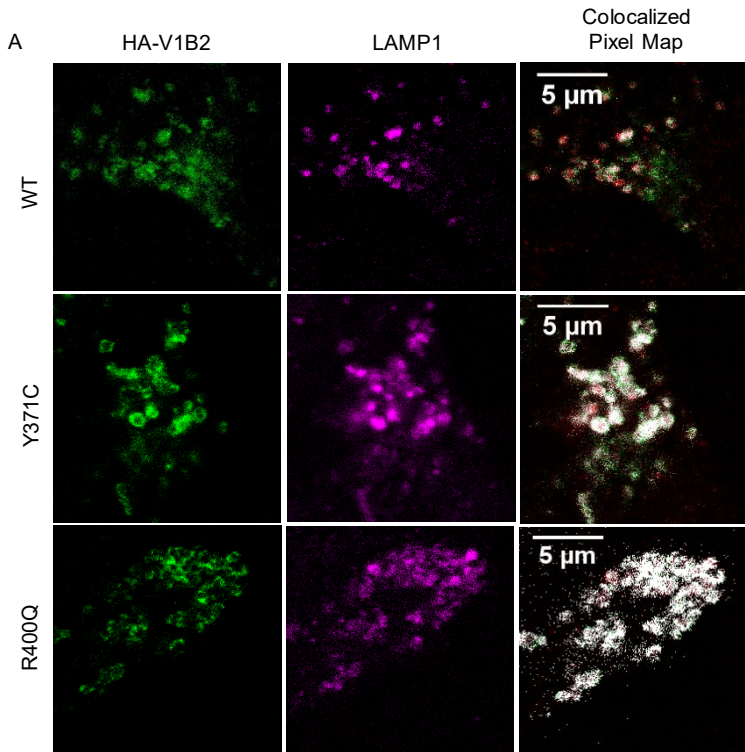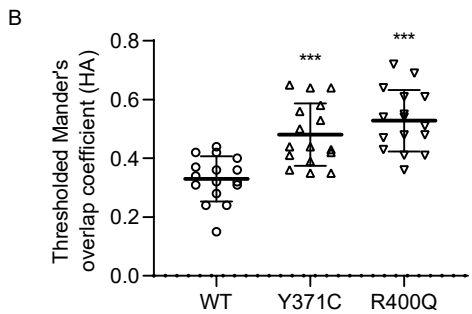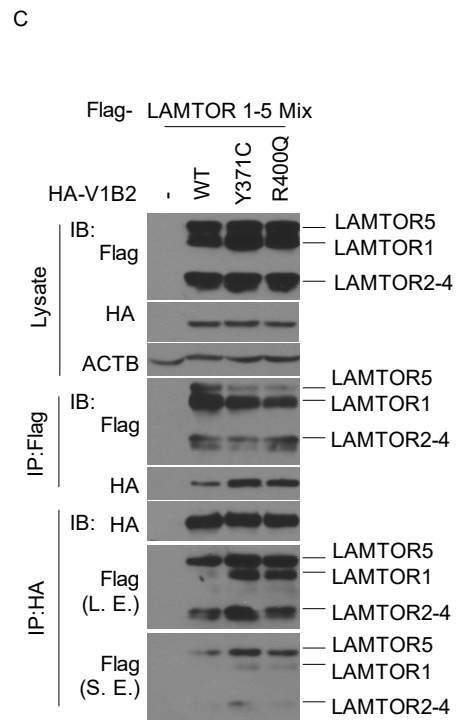

S Figure 8



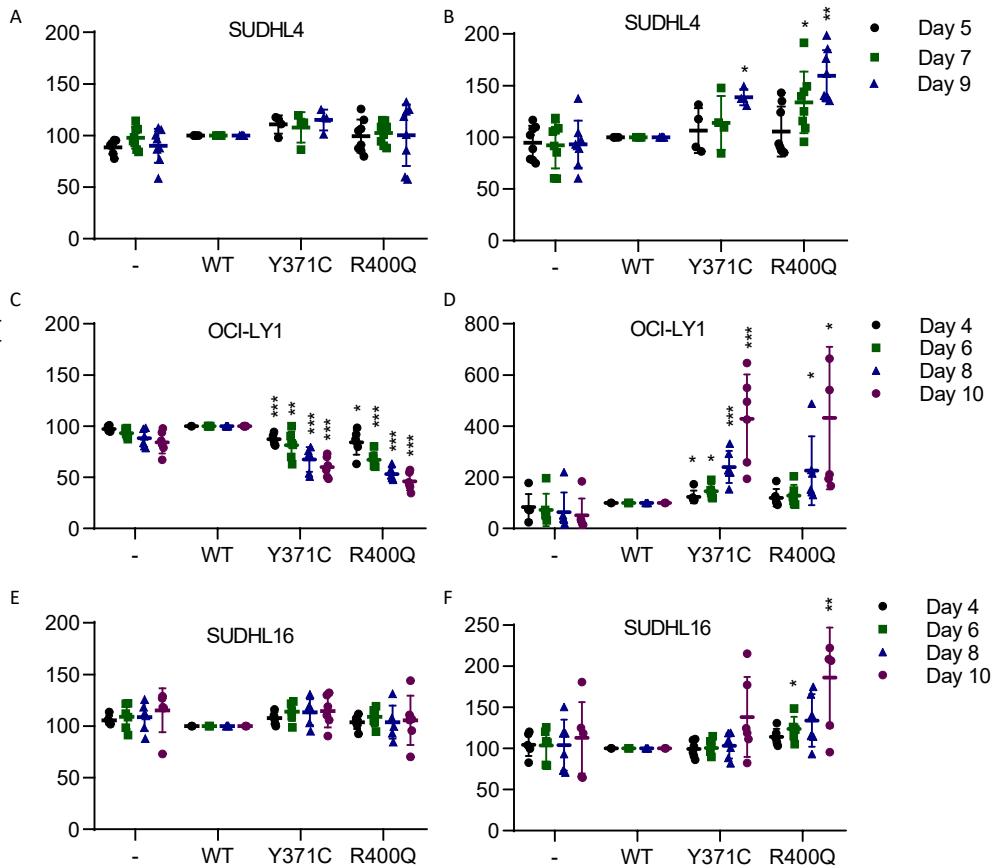

S Figure 9

A

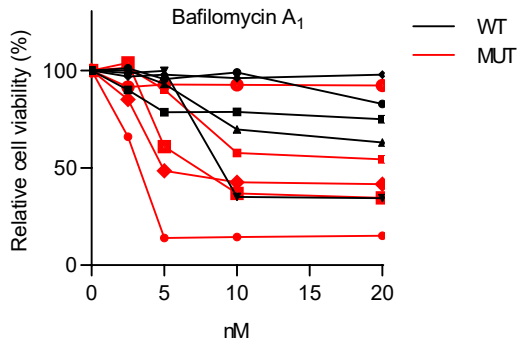

S Figure 10

B

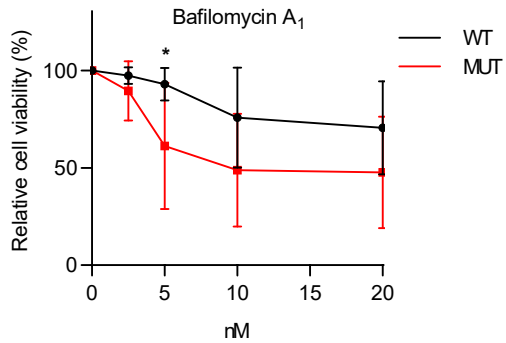

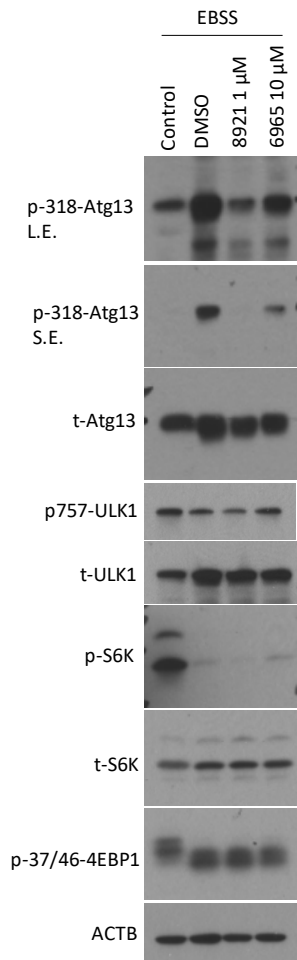

S Figure 11

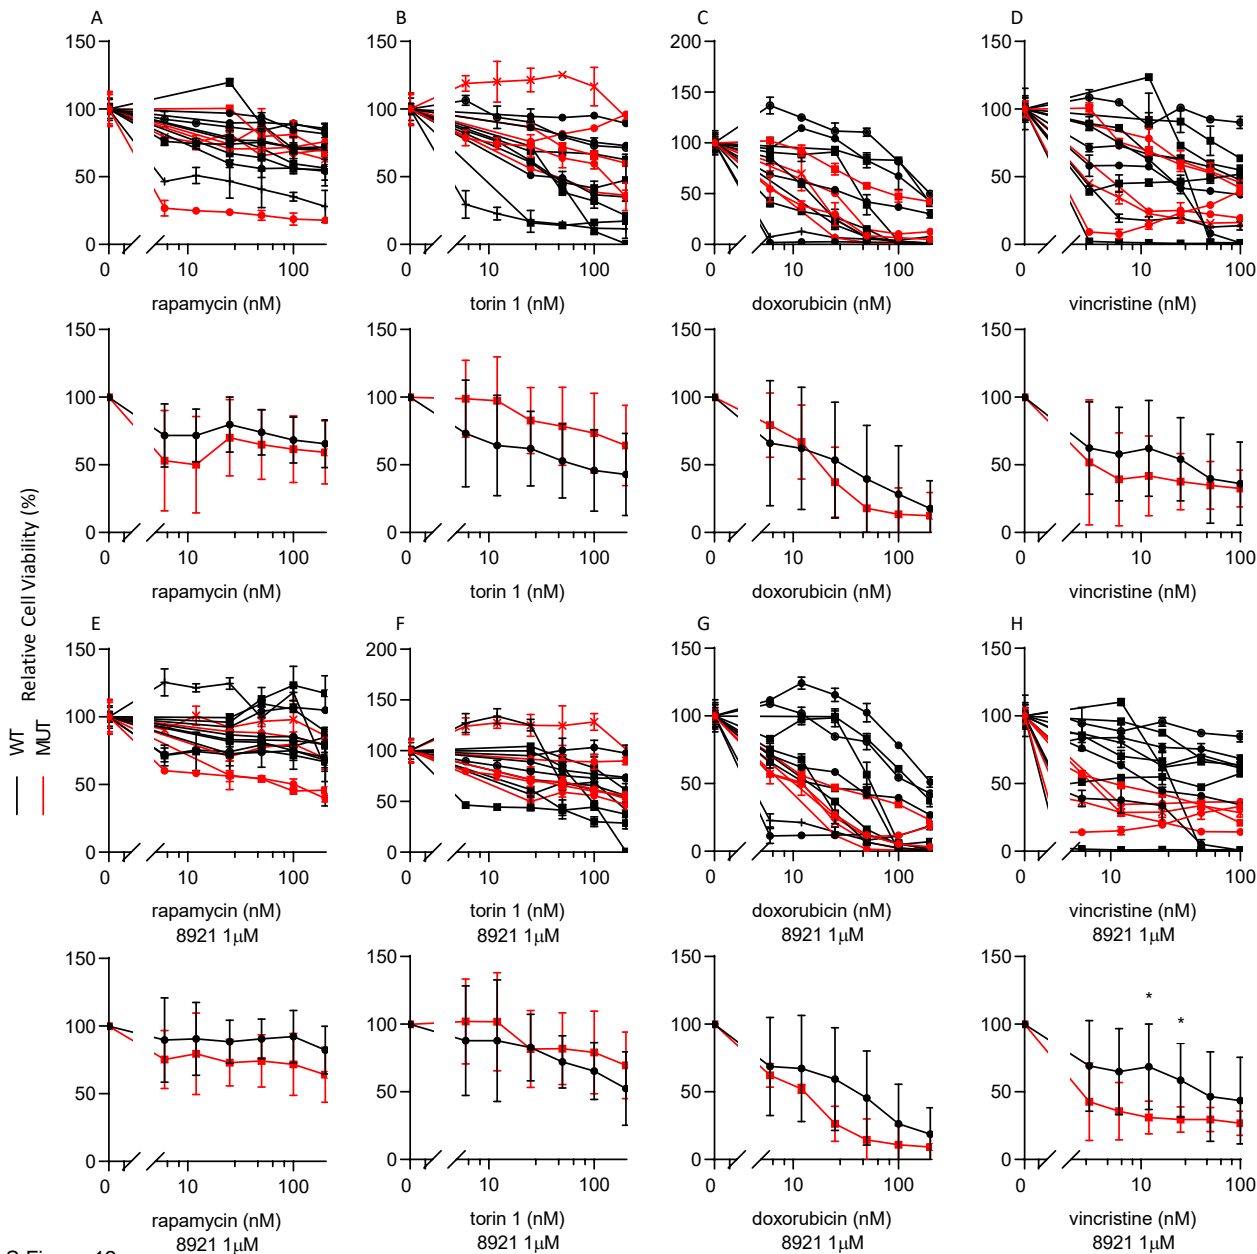

S Figure 12

**Supplemental Table 1. Antibodies used in this study.**

| <b>Name</b>                      | <b>Company</b>            | <b>Catalog #</b> |
|----------------------------------|---------------------------|------------------|
| anti-V1B2                        | Cell Signaling Technology | 14488            |
| anti-LC3A/B                      | Cell Signaling Technology | 12741            |
| anti-RPS6KB/S6 kinase            | Cell Signaling Technology | 9202             |
| anti-p-RPS6KB/S6 kinase (Thr389) | Cell Signaling Technology | 9205             |
| anti-ATG7                        | Cell Signaling Technology | 8558             |
| anti-SQSTM1/p62                  | Cell Signaling Technology | 5114             |
| anti-ATF4                        | Cell Signaling Technology | 11815            |
| anti-p37/46-EIF4EBP1             | Cell Signaling Technology | 2855             |
| anti-p65-EIF4EBP1                | Cell Signaling Technology | 9451             |
| anti-p70-EIF4EBP1                | Cell Signaling Technology | 9455             |
| anti-ULK1                        | Cell Signaling Technology | 8054             |
| anti-p757-ULK1                   | Cell Signaling Technology | 6888             |
| anti-p371-ULK1                   | Cell Signaling Technology | 12753            |
| anti-ATG13                       | Cell Signaling Technology | 13273            |
| anti-p-ATG13                     | Rockland                  | 36708            |
| anti-ACTB                        | Sigma-Aldrich             | A544             |
| anti-YFP                         | Clontech/TaKaRa           | 632381           |
| anti-peroxidase (protein A)      | Jackson ImmunoResearch    | 323-005-024      |
| goat anti-rabbit Alexa Fluor 488 | Life Technologies         | 1790498          |
| goat anti-mouse Alexa Fluor 647  | Life Technologies         | A21235           |

## Follicular lymphoma-associated mutations in vacuolar ATPase ATP6V1B2 activate autophagic flux and MTOR

Fangyang Wang<sup>1\*</sup>, Damián Gatica<sup>2,3\*</sup>, Zhang Xiao Ying<sup>1</sup>, Luke F. Peterson<sup>1</sup>, Peter Kim<sup>1</sup>,  
Denzil Bernard<sup>1</sup>, Kamlai Saiya-Cork<sup>1</sup>, Shaomeng Wang<sup>1</sup>, Mark S. Kaminski<sup>1</sup>, Alfred E.  
Chang<sup>4</sup>, Tycel Phillips<sup>1</sup>, Daniel J. Klionsky<sup>2,3\*</sup> and Sami N. Malek<sup>1,5\*</sup>

From the Department of Internal Medicine, Division of Hematology and Oncology<sup>1</sup>, Life  
Sciences Institute<sup>2</sup>, Department of Molecular, Cellular and Developmental Biology<sup>3</sup>,  
Department of Surgery<sup>4</sup>, University of Michigan, Ann Arbor, MI, USA.

### SUPPLEMENTARY FIGURE AND TABLE LEGENDS

**Supplementary Figure 1: A:** Location of identified ATP6V1B2 mutation sites Y371C and R400Q (sticks) on homology models of V1B2 subunit of the vATPase. **B:** Conformational changes of yeast subunit B residues Y352 and R381 (shown as ball and sticks) in the 3 different yeast VMA2 catalytic states: open (subunit A: orange; subunit B: blue); loose (subunit A: yellow; subunit B: magenta) and tight (subunit A: grey; subunit B: pink). Residues of subunit A neighboring Y352 and R381 are shown as lines. Figures generated using Pymol.

**Supplementary Figure 2: S. Cerevisiae strains carrying both WT and mutant R381Q Vma2-HA activate autophagic flux.** To mimic the *ATP6V1B2* heterozygous mutation in mammalian cells, WT or R381Q *VMA2-HA* were integrated in the *S. cerevisiae* strain WLY176. Autophagy activity was measured under growing and nitrogen starvation conditions at the indicated timepoints using **A:** The Pho8 $\Delta$ 60 activity, and, **B:** The GFP-

Atg8 processing assay. Statistical comparison for SD-N (3h) conditions were done using t testing. \*  $p < 0.05$ .

**Supplementary Figure 3: Phospho-4EBP1 measurements in inducible ATP6V1B2 mutant cell lines:** **A:** Stable HEK293T cells were generated using the inducible lentiviral system pCW57.1 carrying either wild-type or mutated cDNAs encoding HA-tagged ATP6V1B2. Cells were induced with doxycycline 72 h and prepared for immunoblotting with various antibodies as indicated. Treatment with torin 1 at 50 nM for 4 h was used as control. One of three representative immunoblots is shown. **B-D:** Combined quantitation results from three independent experiments using ImageJ densitometry with results indexed to the measurements for empty vector with doxycycline induction. Statistical comparison for WT, Y371C and R400Q were done using t testing with Bonferroni corrections. \*  $p < 0.05$ . The mean and standard deviations are plotted. **B:** p70-4EBP1/t-4EBP1; **C:** p65-4EBP1/t-4EBP1; **D:** p37/46-4EBP1/t-4EBP1.

**Supplementary Figure 4: Measurements of mTOR- and AMPK-dependent ULK1 phosphorylation in inducible ATP6V1B2 wild type and mutant cell lines:** Inducible cell lines were left untreated (lanes 1-4) or treated with doxycycline for 48 h (lanes 5-8). Immunoblotting results for **A:** HEK293T cells and **B:** OCI-LY1 lymphoma cells. Protein lysates were prepared for immunoblotting with antibodies targeting epitopes as indicated. In parallel, cells were also grown in full medium, or glucose-free medium, or Leucine-free medium (lanes 9-11).

**Supplementary Figure 5: Induction of ATF4 by ATP6V1B2 p. R400Q:** Inducible cell lines were left untreated (lanes 1-4) or treated with doxycycline for 48 h (lanes 5-8). Immunoblotting results for **A:** HEK293T cells and **B:** OCI-LY1 lymphoma cells. Protein lysates were prepared for immunoblotting with antibodies targeting epitopes as indicated. In parallel, cells were also grown in full medium, or glucose-free medium, or Leucine-free medium (lanes 9-11).

**Supplementary Figure 6: A: Generation of ATF4 null cells:** ATF4 induction by leucine starvation (4h) in uninduced doxycycline-inducible HEK293T cells carrying empty vector or WT or mutated ATP6V1B2 parental (left) and *ATF4*<sup>-/-</sup> gene disrupted (using crispr-Cas9) cells (right). **B:** LC3-II levels in uninduced and induced doxycycline-inducible HEK293T cells carrying empty vector or WT or mutated ATP6V1B2 parental (left) cells and *ATF4*<sup>-/-</sup> gene disrupted (using crispr-Cas9) cells (right). **C: Induction of ATG genes by mutant Vma2<sup>R381Q</sup>-HA:** *S. cerevisiae* strain WLY176 was used to generate *gcn2Δ*, *gcn4Δ* and *gcn2Δgcn4Δ* deletion strains. Vma2-HA or mutant Vma2<sup>R381Q</sup>-HA was knocked-in all three deletion strains. *ATG1*, *ATG7*, *ATG8* and *ATG41* mRNA levels were determined by RT-qPCR. Error bars indicate the standard deviation of 3 independent experiments. ANOVA, \*p< 0.05 \*\*\*p< 0.001.

**Supplementary Figure 7: Results of co-immunoprecipitation of ATP6V1B2 and ATP6V1A.** Immunoprecipitations were performed out of HEK293T cells transiently transfected with HA-tagged ATP6V1B2 wild type or mutants as indicated.

**Supplementary Figure 8: Increased localization of follicular lymphoma-associated ATP6V1B2 mutant proteins to lysosomes. A:** Stable HEK293T inducible cell lines carrying WT or mutated *ATP6V1B2* cDNAs were generated using the doxycycline-inducible lentiviral pCW57.1 vector. Following induction with doxycycline for 24 h, HEK293T cells were prepared for immunofluorescence staining with anti-HA and LAMP1 antibodies (LAMP1 is localized to the lysosomal membranes and is used as a colocalization marker). The colocalized pixel images and quantification were generated using ImageJ software. **B:** Mutated V1B2 proteins demonstrate increased colocalization with LAMP1 (image quantification). Colocalization was analyzed by Mander's overlap coefficient in ImageJ for 16 different regions in each group (N=16). Statistical comparison for WT, Y371C and R400Q were done using t testing with Bonferroni corrections. \*\*\* p<0.001. The mean and standard deviations are plotted. **C:** ATP6V1B2 mutants demonstrate modestly increased binding with LAMTOR1-LAMTOR5 (regulator) components. HEK293T cell were transiently co-transfected as indicated with expression plasmids encoding Flag-tagged *LAMTOR1-LAMTOR5* cDNAs and either HA-tagged



ATP6V1B2 WT or the indicated ATP6V1B2 mutants. CHAPS detergent lysates were prepared and subjected to anti-HA-bead or anti-Flag-bead conjugate-mediated immunoprecipitations. Following washings, bound protein was eluted and fractioned by SDS-PAGE and prepared for immunoblotting with the indicated antibodies.

**Supplementary Figure 9: Follicular lymphoma-associated ATP6V1B2 mutations increase the viability and growth of lymphoma cell lines under leucine starvation conditions.**

**A-B:** SUDHL4 cells were double spin-inoculated on day 0 and day 1 with bicistronic FG9 lentiviruses carrying WT or mutant *ATP6V1B2* cDNAs. The infection efficiency was confirmed on day 3 through FACS based on GFP fluorescence and was >90%. On day 3, cells were seeded at  $5 \times 10^5$  cells per ml and cultured in full RPMI 1640 medium supplemented with 10% FBS. Parallel cell aliquots were cultured under otherwise identical conditions but using only 25% of the leucine concentration. Cells were counted every other day using Trypan blue and diluted back to a concentration of  $5 \times 10^5$  cells per ml. The histograms were normalized to the counts for WT ATP6V1B2 indexed to 100% and are based on 4 independent experiments. **C-F:** Doxycycline-inducible stable OCI-LY1 or SUDHL16 cell lines were generated through infections with the pCW57.1 vector carrying WT or mutated *ATP6V1B2* cDNAs. After 48 h of doxycycline induction, cells were seeded at  $5 \times 10^5$  cells per ml and cultured in full RPMI 1640 medium supplemented with 10% FBS. Parallel cell aliquots were cultured under otherwise identical conditions but using only 25% of the leucine concentration. Cells were counted every other day using Trypan blue and diluted back to a concentration of  $5 \times 10^5$  cells per ml. The data were normalized to the counts for wild-type ATP6V1B2 indexed to 100% and are based on 3 independent experiments. Statistical comparison for WT, Y371C and R400Q were done using t testing with Bonferroni corrections. The mean and standard deviations are plotted. \*  $p < 0.05$ , \*\*  $p < 0.01$ , \*\*\*  $p < 0.001$ .

**Supplementary Figure 10: Follicular lymphoma-associated ATP6V1B2 mutations and dependence on autophagic flux for survival of primary FL B cells:**

**A:** Purified FL B cells carrying wild type (black; N=5) or mutant *ATP6V1B2* (red; N=4) were cultured in serum-supplemented RPMI1640 medium and treated with bafilomycin A<sub>1</sub> for 72 h at

the indicated concentrations. Cell viability was measured using ANXA5/annexin V-propidium iodide and is displayed normalized to the viability of cells cultured for 72 h but left untreated. **B**: composite of data shown in **panel A** with standard deviations (SD); Statistical comparison for each concentration were done using t testing. \*  $p < 0.05$ .

**Supplementary Figure 11: Inhibition of ATG13 phosphorylation by chemical ULK1 inhibitors:** HEK293T cells were cultured in EBSS buffer for 1 h alone, or in the presence of ULK1 kinase inhibitors at 1  $\mu$ M MRT68921 (8921) or 10  $\mu$ M SBI-0206965 (6965). Protein lysates were prepared for immunoblotting with antibodies targeting epitopes as indicated.

**Supplementary Figure 12: Cell viability following drug treatment of primary purified human FL B cells: A-D:** Purified human FL B cells harboring wild type or mutant *ATP6V1B2* were cultured in serum-supplemented RPMI 1640 medium containing 100% Leu and treated with rapamycin, torin 1, doxorubicin or vincristine for 72 h at the indicated concentrations. Cell viability was measured using Celltiter-Glo<sup>®</sup> and is displayed normalized to the viability of cells cultured for 72 h but left untreated. Red: mutant *ATP6V1B2*; Black: wild type *ATP6V1B2*. Upper row: data from individual FL samples; bottom row: mean plus standard deviations (SD) of data shown in the upper row. **E-H:** Purified human FL B cells harboring wild type or mutant *ATP6V1B2* were cultured in serum-supplemented RPMI 1640 medium containing 100% Leu and treated with rapamycin, torin 1, doxorubicin or vincristine combined with 1  $\mu$ M of the ULK1 inhibitor MRT68921 for 72 h at the indicated concentrations. Cell viability was measured using Celltiter-Glo<sup>®</sup> and is displayed normalized to the viability of cells cultured for 72 h but left untreated. Red: mutant *ATP6V1B2*; Black: wild type *ATP6V1B2*. Upper row: data from individual FL sample; bottom row: mean plus standard deviations (SD) of data shown in the upper row; Statistical comparisons for each concentration were done using t testing. \*  $p < 0.05$ .

**Supplementary Table 1: Antibody sources**
